# Supplementary material for: Short-lived long non-coding RNAs as surrogate indicators for chemical exposure and LINC00152 and MALAT1 modulate their neighboring genes
Source: PubMed Central journal article supplement (PMC5515456; doi:10.1371/journal.pone.0181628), 2017-07-18
Supplement: pone.0181628.s001.pdf [file pone.0181628.s001.pdf]

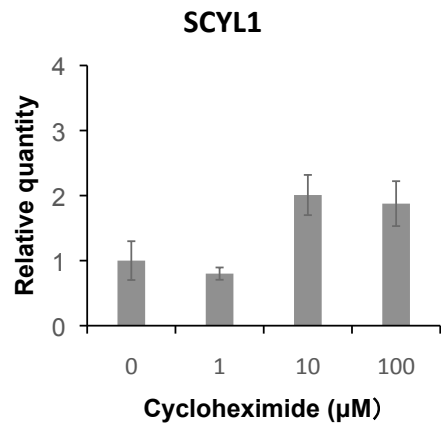

**S1 Fig. Alterations in MALAT1-neighboring gene.** Expression levels of SCYL1 were determined by RT-qPCR. GAPDH, ACTB, HPRT1, and PGK1 were used for normalization. Values represent mean  $\pm$  SD obtained from three independent experiments.
