# Supplementary material for: Short-lived long non-coding RNAs as surrogate indicators for chemical exposure and LINC00152 and MALAT1 modulate their neighboring genes
Source: PubMed Central journal article supplement (PMC5515456; doi:10.1371/journal.pone.0181628), 2017-07-18
Supplement: pone.0181628.s002.pdf [file pone.0181628.s002.pdf]

**S1 Table. mRNA biomarkers list**

| Gene     | Function of Stress       |
|----------|--------------------------|
| SOX1     | Differentiation marker   |
| POU5F1   | Differentiation marker   |
| NFKB1    | Oxidative stress         |
| JUN      | Oxidative stress         |
| HIF1A    | Oxidative stress         |
| PPP1R15A | DNA damage               |
| GADD45A  | DNA damage               |
| DDIT3    | DNA damage               |
| TP53     | DNA damage               |
| CDKN1A   | DNA damage               |
| TP53I3   | DNA damage               |
| HSPA4    | Heat shock response      |
| HSP90AA1 | Heat shock response      |
| HSF1     | Heat shock response      |
| ATF3     | ER stress Response       |
| ERO1A    | ER stress Response       |
| BBC3     | ER stress Response       |
| ARNT     | Hypoxia Inducible Factor |
| MTF1     | Heavy Metal Stress       |
