# Supplementary material for: Short-lived long non-coding RNAs as surrogate indicators for chemical exposure and LINC00152 and MALAT1 modulate their neighboring genes
Source: PubMed Central journal article supplement (PMC5515456; doi:10.1371/journal.pone.0181628), 2017-07-18
Supplement: pone.0181628.s004.pdf [file pone.0181628.s004.pdf]

**S3 Table. Primer pairs for RT-qPCR**

| Name           | Sence sequece (5'-3')       | Antisense sequece (5'-3')   |
|----------------|-----------------------------|-----------------------------|
| <b>"mRNA"</b>  |                             |                             |
| GAPDH          | GCACCGTCAAGGCTGAGAAC        | TGGTGAAGACGCCAGTGG          |
| ACTB           | CCAACCGCGAGAAGATGA          | CCAGAGGCGTACAGGGATAG        |
| HPRT1          | TGACCTTGATTTATTTTGCATACC    | CGAGCAAGACGTTTCAGTCCT       |
| PGK1           | CTGTGGCTTCTGGCATACT         | CGAGTGACAGCCTCAGCATA        |
| SOX1           | ACCAGGCCATGGATGAAG          | CTTAATTGCTGGGAATTGG         |
| POU5F1         | ATCAAGCAGCGACTATGCAC        | CCAGAGGAAAGGACACTGGT        |
| NFKB1          | CTGGCAGCTCTTCTCAAAGC        | TCCAGGTCATAGAGAGGCTCA       |
| JUN            | CCAAAGGATAGTGCGATGTTT       | CTGTCCCTCTCCACTGCAAC        |
| HIF1A          | TTTTTCAAGCAGTAGGAATTGGA     | GTGATGTAGTAGCTGCATGATCG     |
| PPP1R15A       | GCTTCTGGCAGACCGAAC          | GTAGCCTGATGGGGTGCTT         |
| GADD45A        | TTTGCAATATGACTTTGGAGGA      | CATCCCCACCTTTCCAT           |
| DDIT3          | CAGAGCTGGAACCTGAGGAG        | CCTGCCGTTTTAAAATTTTTGG      |
| TP53           | CATGAGCGCTGCTCAGATAG        | ACACGCAAATTTCCCTCCAC        |
| CDKN1A         | CTGGTACCCTCCTGGCTCTT        | CCCAGTGCAGGTCAGAGG          |
| TP53I3         | AATGCTTTCACGGAGCAAATTC      | TTCGGTCACTGGGTAGATTCT       |
| HSPA4          | CAGCAGACACCAGCAGAAAA        | CCTTGATCCAGCTTGAGAG         |
| HSP90AA1       | GGGCAACACCTCTACAAGGA        | CTTGGGTCTGGGTTTCCTC         |
| HSF1           | CAAGCTGTGGACCCTCGT          | TGGAACACGTGGAAGCTGT         |
| ATF3           | AAGGATTTTTCAGCACCTTGC       | GATGGCAGAAGCACTCACTC        |
| ERO1A          | GGAGACAGCGGCACAGAG          | CAATGGTTTCAACATCACAGGT      |
| BBC3           | GACCTCAACGCACAGTACGAG       | AGGAGTCCCATGATGAGATTGT      |
| ARNT           | CTACCCGCTCAGGCTTTTC         | CACCAAACCTGGGAAGTACGAG      |
| MTF1           | TGAATTGCGAGAAAATTCCA        | GCTGGTGAATTTGTGCTGAG        |
| <b>"ncRNA"</b> |                             |                             |
| CDKN2B-AS1     | TTGTTAGAAACCAGGCTGCAC       | TTCTCTCTTTCTGTGGTTTCTCAAT   |
| HOTAIR         | CAGTGGGGAACCTGACTCG         | GTGCTGGTGTCTCTTACC          |
| TUG1           | CCAGACCCTCAGTGCAAACCT       | AATCAGGAGGCACAGGACA         |
| GAS5           | CTTGCTGGACCAGCTTAAT         | CAAGCCGACTCTCCATACCT        |
| MIR22HG        | CGGACGCAAGTATTTGCT          | GCTTTAGCTGGGTCAGGACA        |
| LINC-PINT      | GGGATAATTTGCCATCTGGA        | CCGTTTCTCCATTTTCTCT         |
| KMT2E-AS1      | CAGCCAAAATCTGGCCTACT        | GTCCAGCAATCATTTTCTCGT       |
| LINC00667      | AGTTTGGCCTTTTGGTCT          | GGCCATGTGCAAAGGATTT         |
| HCG18          | CTGCCTTCTAGGGGCTCACT        | ACATGCTCCACCAACTTTCA        |
| LOC550112      | CTGAAATCAGAGCCTGCACA        | TCAAGGACCTGGAAATGACC        |
| LINC00662      | GTTTGATTTCTCGCAGACCAG       | GCGAGGTCTAACCCAGGTG         |
| GABPB1-AS1     | AGGGAAAGAAAATATGCCATTTCTA   | ATCATTCCGCCGCTTTCT          |
| LINC01184      | GCAATTATCACGGGAAACCTAT      | AAATCTTATCTGCTTCCCTATTTGTAA |
| TTN-AS1        | TCCTTAGGCATCACCTAGCC        | GATGGAGGAAGTAGAGTCATTGG     |
| LINC01137      | CACTCCCTAACCCGTGTCC         | TCCATCAAAGCAGCCAGAC         |
| LINC00473_v1   | TATGCGCGTCAGCATACTTT        | TGCTCTGTGCCTCCCTGT          |
| LINC00473_v2   | TATGCGCGTCAGCATACTTT        | TCTCCCAAAGCACAACGAG         |
| FAM222A-AS1    | CAACATGGAAATGGAGACCA        | CTTCCGGGATCCCAGTGT          |
| LINC00152      | CGTGCCTGTCTTCAGATCTTC       | TCATCTCCAGTTATTCAAGGAG      |
| LINC0541471_v1 | CAGATCTTTCACAGCACAGTTCC     | TGCTGATCCACTTTGCTTGT        |
| LINC0541471_v2 | CACCAGCCTCTCCCTGAA          | TTGATCAAGTGTGTCATAGAGC      |
| IDI2-AS1       | GTGTTAAACAAGACAACGCTGAA     | AAGAGCGCTGGAAAAACCTT        |
| SNHG15         | GCAACTCCTTTGCAAGATGC        | CTCAAGGAGGGACCTCAGC         |
| ZFP91-CNTF     | TTGTTTACTACTTGGCGGTGA       | GGCGGGCCTAATCATTTT          |
| MALAT1         | GCTGTGGAGTTCTTAAATATCAACC   | TTCTCAATCCTGAAATCCCCTA      |
| NEAT1_v1       | TTGTTCCAGAGCCCATGAT         | TGAAAACCTTTACCCAGGA         |
| NEAT1_v2       | GATCTTTTCCACCCCAAGAGTACATAA | CTCACACAAACACAGATTCCACAAC   |
