# Supplementary material for: Short-lived long non-coding RNAs as surrogate indicators for chemical exposure and LINC00152 and MALAT1 modulate their neighboring genes
Source: PubMed Central journal article supplement (PMC5515456; doi:10.1371/journal.pone.0181628), 2017-07-18
Supplement: pone.0181628.s006.pdf [file pone.0181628.s006.pdf]

**S5 Table. Alterations in mRNA and lncRNA expression levels in NSCs in response to mercury II chloride**

| Gene           | Mean (Exposure/Control) | SD     | <i>P</i> -value |
|----------------|-------------------------|--------|-----------------|
| SOX1           | 0.0068                  | 0.0003 | < 0.05          |
| POU5F1         | 0.0139                  | 0.0005 | < 0.05          |
| NFKB1          | 0.3838                  | 0.0164 | < 0.05          |
| JUN            | 8.7642                  | 1.0152 | < 0.05          |
| HIF1A          | 2.1473                  | 0.1837 | < 0.05          |
| PPP1R15A       | 1.8925                  | 0.0677 | < 0.05          |
| GADD45A        | 3.7185                  | 0.2204 | < 0.05          |
| DDIT3          | 3.0090                  | 0.1759 | < 0.05          |
| TP53           | 2.2255                  | 0.1802 | < 0.05          |
| CDKN1A         | 11.1951                 | 0.8612 | < 0.05          |
| TP53I3         | 0.2868                  | 0.0057 | < 0.05          |
| HSPA4          | 5.9282                  | 0.0012 | < 0.05          |
| HSP90AA1       | 0.0235                  | 0.0124 | 0.11            |
| HSF1           | 0.2694                  | 0.0082 | < 0.05          |
| ATF3           | 2.6108                  | 0.1549 | < 0.05          |
| ERO1A          | 0.9295                  | 0.0596 | < 0.05          |
| BBC3           | 0.8568                  | 0.0801 | < 0.05          |
| ARNT           | 3.4225                  | 0.1254 | < 0.05          |
| MTF1           | 4.4830                  | 0.1894 | < 0.05          |
| CDKN2B-AS1     | 0.0000                  | 0.0000 | < 0.05          |
| HOTAIR         | 0.0117                  | 0.0016 | < 0.05          |
| TUG1           | 6.9834                  | 0.3605 | < 0.05          |
| GAS5           | 4.9620                  | 0.2170 | < 0.05          |
| MIR22HG        | 0.0851                  | 0.0055 | < 0.05          |
| LINC-PINT      | 0.0291                  | 0.0037 | < 0.05          |
| KMT2E-AS1      | 0.2736                  | 0.0159 | < 0.05          |
| LINC00667      | 0.6613                  | 0.0313 | < 0.05          |
| HCG18          | 2.2017                  | 0.1593 | < 0.05          |
| LOC550112      | 2.3558                  | 0.1928 | < 0.05          |
| LINC00662      | 0.6256                  | 0.3618 | 0.32            |
| GABPB1-AS1     | 5.4931                  | 0.2504 | < 0.05          |
| LINC01184      | 2.3806                  | 0.2292 | < 0.05          |
| TTN-AS1        | 2.5263                  | 0.1473 | < 0.05          |
| LINC01137      | 0.2907                  | 0.0168 | < 0.05          |
| LINC00473_v1   | 0.0383                  | 0.0125 | < 0.05          |
| LINC00473_v2   | 2.5873                  | 0.1301 | < 0.05          |
| FAM222A-AS1    | 26.4457                 | 1.7687 | < 0.05          |
| LINC00152      | 6.3849                  | 0.4670 | < 0.05          |
| LINC0541471_v1 | 17.9862                 | 0.9079 | < 0.05          |
| LINC0541471_v2 | 4.1788                  | 0.2858 | < 0.05          |
| IDI2-AS1       | 0.1413                  | 0.0055 | < 0.05          |
| SNHG15         | 4.7449                  | 0.2041 | < 0.05          |
| ZFP91-CNTF     | 0.0022                  | 0.0001 | 0.34            |
| MALAT1         | 1.9152                  | 0.1362 | < 0.05          |
| NEAT1_v1       | 0.0001                  | 0.0000 | < 0.05          |
| NEAT1_v2       | 0.3980                  | 0.0259 | < 0.05          |
