# Supplementary material for: Short-lived long non-coding RNAs as surrogate indicators for chemical exposure and LINC00152 and MALAT1 modulate their neighboring genes
Source: PubMed Central journal article supplement (PMC5515456; doi:10.1371/journal.pone.0181628), 2017-07-18
Supplement: pone.0181628.s007.pdf [file pone.0181628.s007.pdf]

**S6 Table. Alterations in mRNA and lncRNA expression levels in NSCs in response to cycloheximide**

| Gene           | Mean (Exposure/Control) | SD     | <i>P</i> -value |
|----------------|-------------------------|--------|-----------------|
| SOX1           | 0.0015                  | 0.0001 | < 0.05          |
| POU5F1         | 0.0026                  | 0.0001 | < 0.05          |
| NFKB1          | 1.1205                  | 0.0250 | < 0.05          |
| JUN            | 4.0273                  | 0.3369 | < 0.05          |
| HIF1A          | 0.0991                  | 0.0096 | < 0.05          |
| PPP1R15A       | 1.0305                  | 0.0864 | < 0.05          |
| GADD45A        | 2.8221                  | 0.0770 | < 0.05          |
| DDIT3          | 0.9482                  | 0.0785 | < 0.05          |
| TP53           | 6.6769                  | 0.4710 | < 0.05          |
| CDKN1A         | 4.8258                  | 0.4209 | < 0.05          |
| TP53I3         | 0.3557                  | 0.1795 | 0.307           |
| HSPA4          | 5.9737                  | 0.0035 | < 0.05          |
| HSP90AA1       | 0.0507                  | 0.0035 | < 0.05          |
| HSF1           | 0.2690                  | 0.0118 | < 0.05          |
| ATF3           | 0.0138                  | 0.0023 | < 0.05          |
| ERO1A          | 1.6867                  | 0.1697 | < 0.05          |
| BBC3           | 1.9203                  | 0.1198 | < 0.05          |
| ARNT           | 2.3097                  | 0.0610 | < 0.05          |
| MTF1           | 0.9669                  | 0.0115 | < 0.05          |
| CDKN2B-AS1     | 0.0020                  | 0.0002 | < 0.05          |
| HOTAIR         | 0.0023                  | 0.0003 | < 0.05          |
| TUG1           | 6.5154                  | 0.2396 | < 0.05          |
| GAS5           | 2.7227                  | 0.0595 | < 0.05          |
| MIR22HG        | 0.0294                  | 0.0015 | < 0.05          |
| LINC-PINT      | 0.0101                  | 0.0006 | < 0.05          |
| KMT2E-AS1      | 0.0945                  | 0.0071 | 0.065           |
| LINC00667      | 0.7910                  | 0.0174 | < 0.05          |
| HCG18          | 4.6366                  | 0.3656 | < 0.05          |
| LOC550112      | 4.4596                  | 0.2805 | < 0.05          |
| LINC00662      | 0.3323                  | 0.2117 | 0.394           |
| GABPB1-AS1     | 1.7261                  | 0.0709 | < 0.05          |
| LINC01184      | 3.4119                  | 0.2802 | < 0.05          |
| TTN-AS1        | 1.3750                  | 0.1003 | 0.069           |
| LINC01137      | 0.0203                  | 0.0093 | 0.051           |
| LINC00473_v1   | 0.2957                  | 0.0223 | < 0.05          |
| LINC00473_v2   | 4.3271                  | 0.4692 | < 0.05          |
| FAM222A-AS1    | 6.4233                  | 0.4098 | < 0.05          |
| LINC00152      | 0.5355                  | 0.0465 | < 0.05          |
| LINC0541471_v1 | 6.3338                  | 0.0826 | < 0.05          |
| LINC0541471_v2 | 5.4838                  | 0.4151 | < 0.05          |
| IDI2-AS1       | 0.1117                  | 0.0062 | < 0.05          |
| SNHG15         | 6.0080                  | 0.1424 | < 0.05          |
| ZFP91-CNTF     | 0.0023                  | 0.0001 | < 0.05          |
| MALAT1         | 5.9783                  | 0.3817 | < 0.05          |
| NEAT1_v1       | 0.0000                  | 0.0000 | < 0.05          |
| NEAT1_v2       | 0.0338                  | 0.0009 | < 0.05          |
