# Supplementary material for: Short-lived long non-coding RNAs as surrogate indicators for chemical exposure and LINC00152 and MALAT1 modulate their neighboring genes
Source: PLoS One. 2017 Jul 18;12(7):e0181628. doi: 10.1371/journal.pone.0181628 (PMC5515456; doi:10.1371/journal.pone.0181628)
Supplement: S4 Table — (PDF) [file pone.0181628.s005.pdf]

**S4 Table. Alterations in mRNA and lncRNA expression levels in NSCs in response to hydrogen peroxide**

| Gene           | Mean (Exposure/Control) | SD     | <i>P</i> -value |
|----------------|-------------------------|--------|-----------------|
| SOX1           | 0.0129                  | 0.0001 | < 0.05          |
| POU5F1         | 0.0028                  | 0.0001 | < 0.05          |
| NFKB1          | 0.8643                  | 0.0250 | < 0.05          |
| JUN            | 0.2030                  | 0.3369 | < 0.05          |
| HIF1A          | 3.8692                  | 0.0096 | < 0.05          |
| PPP1R15A       | 0.0412                  | 0.0864 | < 0.05          |
| GADD45A        | 0.8076                  | 0.0770 | < 0.05          |
| DDIT3          | 0.6807                  | 0.0785 | < 0.05          |
| TP53           | 6.8266                  | 0.4710 | < 0.05          |
| CDKN1A         | 1.9200                  | 0.4209 | < 0.05          |
| TP53I3         | 1.0734                  | 0.0018 | < 0.05          |
| HSPA4          | 3.4337                  | 0.0035 | < 0.05          |
| HSP90AA1       | 0.0185                  | 0.0035 | < 0.05          |
| HSF1           | 0.2728                  | 0.0118 | < 0.05          |
| ATF3           | 0.0124                  | 0.0023 | < 0.05          |
| ERO1A          | 3.9314                  | 0.1697 | < 0.05          |
| BBC3           | 0.4536                  | 0.1198 | < 0.05          |
| ARNT           | 8.5513                  | 0.0610 | < 0.05          |
| MTF1           | 1.8965                  | 0.0115 | < 0.05          |
| CDKN2B-AS1     | 0.0011                  | 0.0002 | < 0.05          |
| HOTAIR         | 0.0007                  | 0.0003 | < 0.05          |
| TUG1           | 8.4886                  | 0.2396 | < 0.05          |
| GAS5           | 7.5617                  | 0.0595 | < 0.05          |
| MIR22HG        | 0.0013                  | 0.0015 | < 0.05          |
| LINC-PINT      | 0.0025                  | 0.0006 | < 0.05          |
| KMT2E-AS1      | 0.2721                  | 0.0071 | < 0.05          |
| LINC00667      | 0.9344                  | 0.0174 | < 0.05          |
| HCG18          | 7.1266                  | 0.3656 | < 0.05          |
| LOC550112      | 4.4617                  | 0.2805 | < 0.05          |
| LINC00662      | 1.1328                  | 0.2117 | 0.39            |
| GABPB1-AS1     | 6.3896                  | 0.0709 | < 0.05          |
| LINC01184      | 7.7228                  | 0.2802 | < 0.05          |
| TTN-AS1        | 2.5195                  | 0.1003 | < 0.05          |
| LINC01137      | 0.0595                  | 0.0093 | 0.45            |
| LINC00473_v1   | 0.0340                  | 0.0223 | < 0.05          |
| LINC00473_v2   | 0.5135                  | 0.4692 | < 0.05          |
| FAM222A-AS1    | 7.1735                  | 0.4098 | < 0.05          |
| LINC00152      | 0.6233                  | 0.0465 | < 0.05          |
| LINC0541471_v1 | 1.1835                  | 0.0826 | < 0.05          |
| LINC0541471_v2 | 0.4487                  | 0.4151 | < 0.05          |
| IDI2-AS1       | 0.0222                  | 0.0062 | < 0.05          |
| SNHG15         | 8.8213                  | 0.1424 | < 0.05          |
| ZFP91-CNTF     | 0.0032                  | 0.0001 | < 0.05          |
| MALAT1         | 1.9982                  | 0.3817 | < 0.05          |
| NEAT1_v1       | 0.0000                  | 0.0000 | 0.26            |
| NEAT1_v2       | 0.0264                  | 0.0009 | < 0.05          |
